# Supplementary material for: Cyclodextrins Allow the Combination of Incompatible Vancomycin and Ceftazidime into an Ophthalmic Formulation for the Treatment of Bacterial Keratitis
Source: MDPI journal article supplement (doi:10.3390/ijms221910538), 2021-09-29
Supplement: s1 [file s1]

# Cyclodextrins allow the combination of incompatible vancomycin and ceftazidime into an ophthalmic formulation for the treatment of bacterial keratitis

Yassine Bouattour<sup>1</sup>, Florent Neflot-Bissuel<sup>2</sup>, Mounir Traïkia<sup>3</sup>, Anne-Sophie Biesse-Martin<sup>3</sup>, Robin Frederic<sup>4</sup>, Mouloud Yessaad<sup>2</sup>, Mireille Jouannet<sup>2</sup>, Mathieu Wasiak<sup>2</sup>, Philip Chennell<sup>1\*</sup> and Valerie Sautou<sup>1</sup>

<sup>1</sup> Université Clermont Auvergne, CHU Clermont Ferrand, Clermont Auvergne INP, CNRS, ICCF, F-63000 Clermont-Ferrand, France; ybouattour@chu-clermontferrand.fr; pchennell@chu-clermontferrand.fr; vsautou@chu-clermontferrand.fr

<sup>2</sup> CHU Clermont-Ferrand, Pôle Pharmacie, F-63000 Clermont-Ferrand, France; bissuelflorent@orange.fr; myessaad@chu-clermontferrand.fr; mjouannet@chu-clermontferrand.fr; mwasiak@chu-clermontferrand.fr

<sup>3</sup> Université Clermont Auvergne, CNRS, SIGMA-Clermont, ICCF, F-63000 Clermont-Ferrand, France. mounir.traikia@uca.fr; a-sophie.biesse-martin@uca.fr

<sup>4</sup> Université Clermont Auvergne, Inserm U1071, INRA USC2018, Clermont-Ferrand, France; frobin@chu-clermontferrand.fr

\* Correspondence: pchennell@chu-clermontferrand.fr

## 1. Illustration of the pH dependant nature of the precipitation between ceftazidime and vancomycin

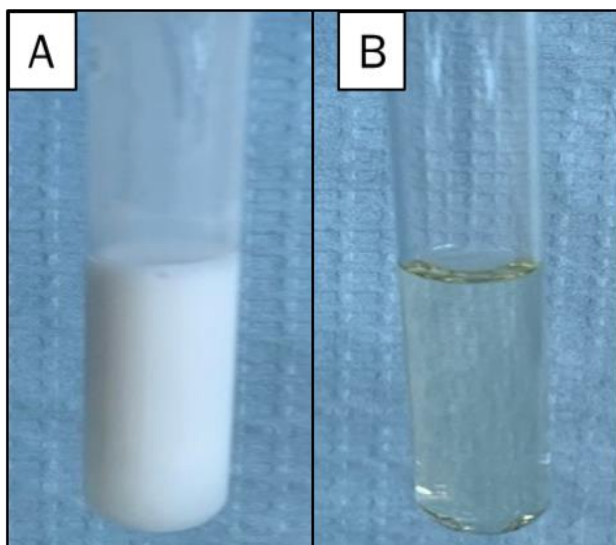

**Figure 1.** Mixture of 25 mg mL<sup>-1</sup> solution of ceftazidime and vancomycin at A) pH below 8.4 and B) pH higher than 8.4

## 2. Validation of ceftazidime and vancomycin quantification method

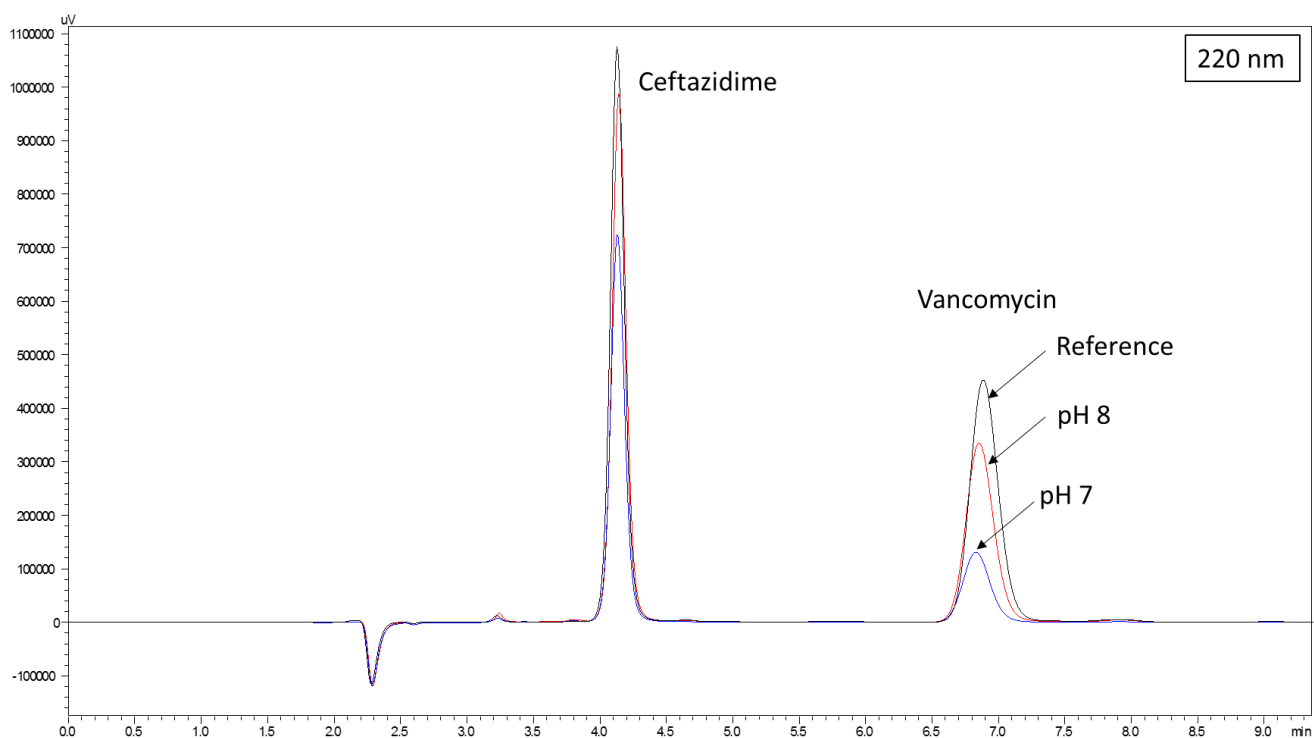

Figure 2: Chromatograms at 220 nm wavelength detection of mixture of ceftazidime and vancomycin at pH 7 and pH 8

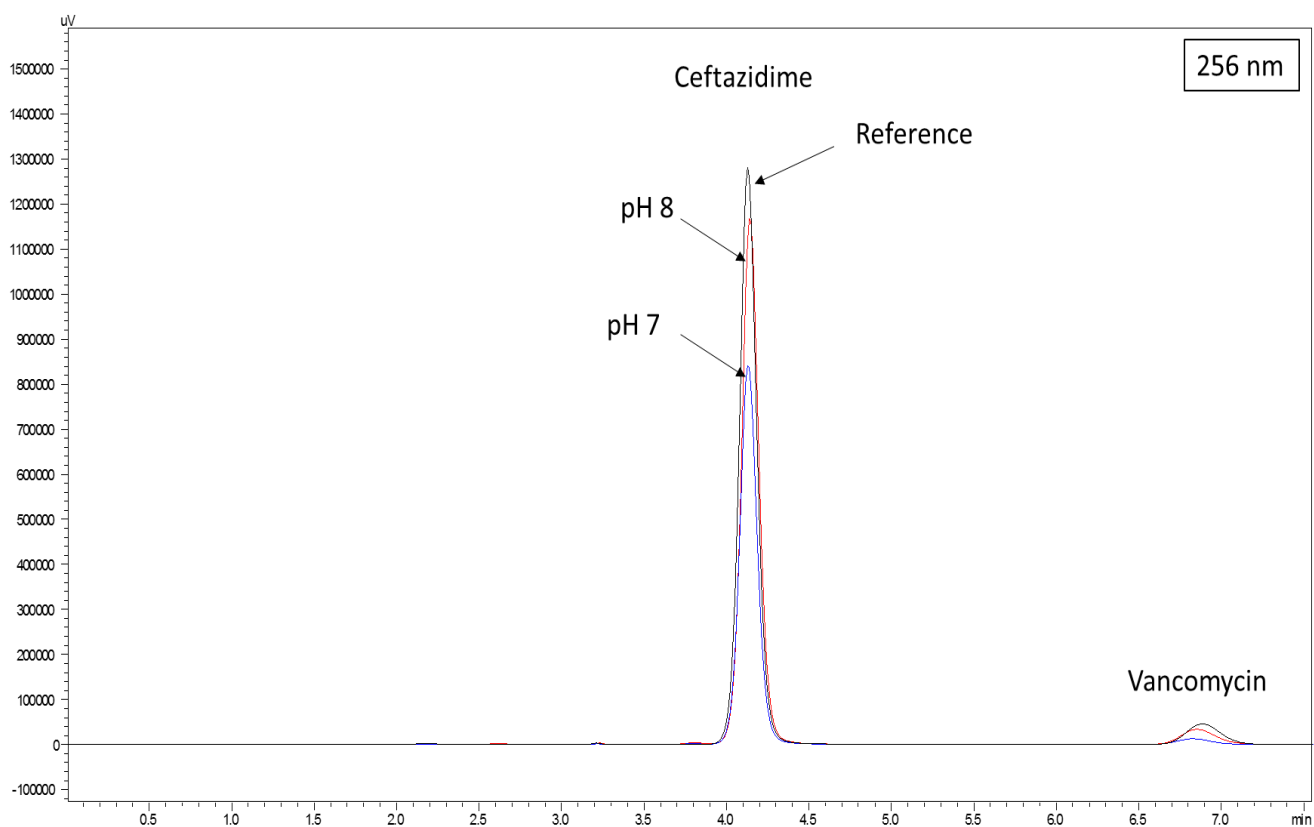

Figure 3 Chromatograms at 256 nm wavelength detection of mixture of ceftazidime and vancomycin at pH 7 and pH 8

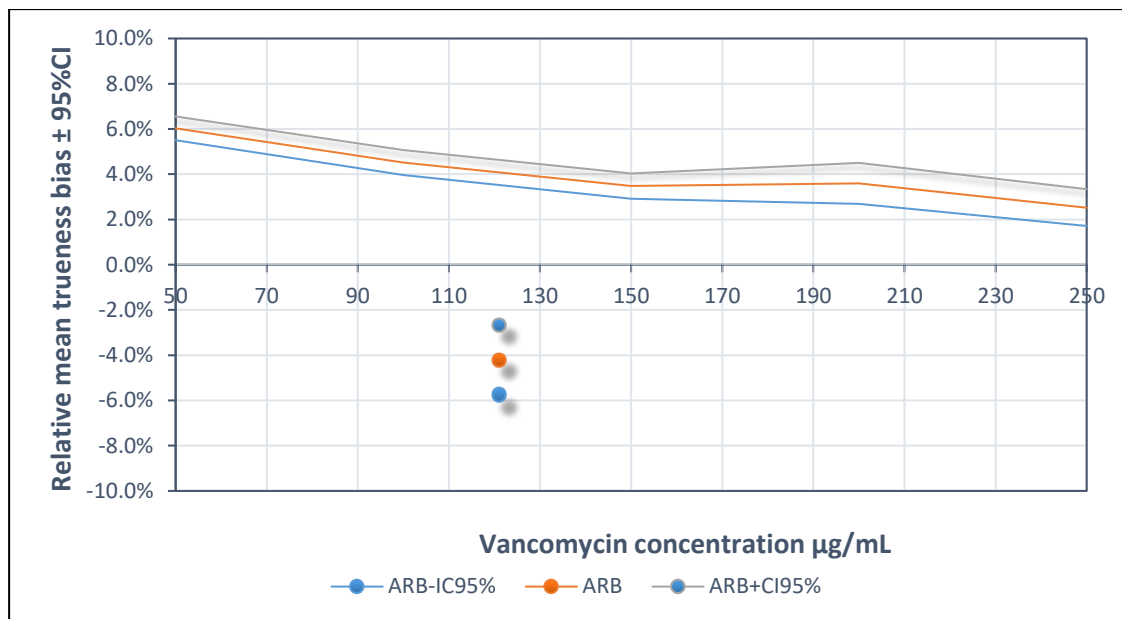

Figure 4 : Accuracy profile of Vancomycin validation. ARB: Average relative trueness bias. CI: confidence interval

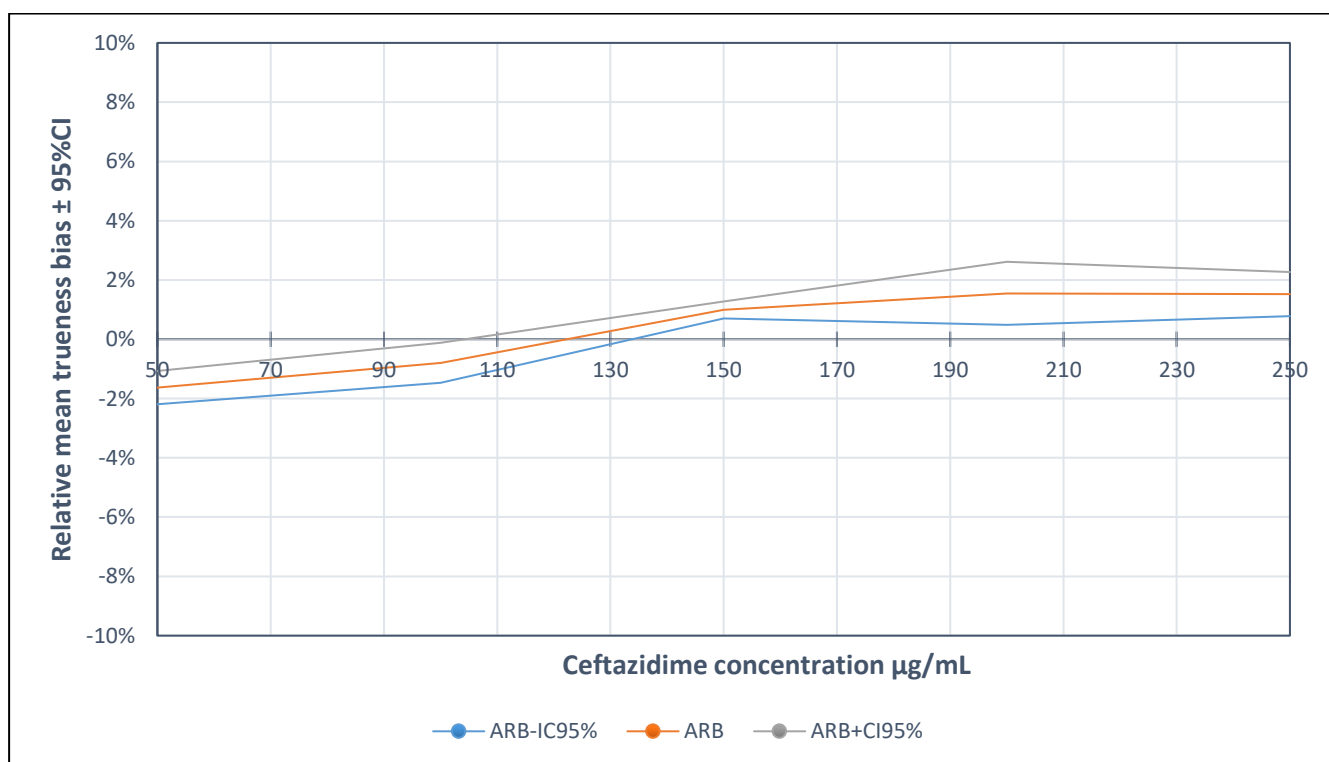

Figure 5 Accuracy profile of Ceftazidime validation. ARB: Average relative trueness bias. CI: confidence interval

### 3. Design of experiment

Table 1: Experimental design realized to calculate the impact of studied parameters on turbidity, particles count and osmolality. NA: Not applicable ; \*: measurement error

| Exp No | Parameters                                 |                                             |                                       |                                        |                                         |                                          |                                | Results               |                    |                            |                          |                           |          |
|--------|--------------------------------------------|---------------------------------------------|---------------------------------------|----------------------------------------|-----------------------------------------|------------------------------------------|--------------------------------|-----------------------|--------------------|----------------------------|--------------------------|---------------------------|----------|
|        | HP $\beta$ CD ratio<br>(compared to<br>VA) | HP $\gamma$ CD ratio<br>(compared to<br>CZ) | VA/<br>HP $\beta$ CD<br>pH<br>mixture | CZ/<br>HP $\gamma$ CD<br>pH<br>mixture | VA/<br>HP $\beta$ CD<br>mixture<br>time | CZ/<br>HP $\gamma$ CD<br>mixture<br>time | pH of the<br>final<br>solution | Visual<br>examination | Turbidity<br>(FNU) | Particules<br>< 10 $\mu$ m | particle<br>> 10 $\mu$ m | Osmolality<br>(mOsmol/kg) | Final pH |
| 1      | 0                                          | 0                                           | 6                                     | 4                                      | 0,5                                     | 0,5                                      | 7                              | 9                     | 1000               | NA                         | NA                       | 211                       | 7        |
| 2      | 5                                          | 0                                           | 3                                     | 4                                      | 0,5                                     | 0,5                                      | 7                              | 9                     | 1000               | NA                         | NA                       | 366                       | 7        |
| 3      | 0                                          | 3                                           | 4                                     | 8                                      | 0,5                                     | 0,5                                      | 7                              | 9                     | 1000               | NA                         | NA                       | 315                       | 7        |
| 4      | 5                                          | 3                                           | 6                                     | 4                                      | 0,5                                     | 0,5                                      | 7                              | 9                     | 1000               | NA                         | NA                       | 633                       | 7        |
| 5      | 5                                          | 0                                           | 6                                     | 8                                      | 2                                       | 0,5                                      | 7                              | 9                     | 1000               | NA                         | NA                       | 265                       | 7        |
| 6      | 0                                          | 3                                           | 3                                     | 4                                      | 2                                       | 0,5                                      | 7                              | 9                     | 1000               | NA                         | NA                       | 399                       | 7        |
| 7      | 5                                          | 3                                           | 3                                     | 8                                      | 2                                       | 0,5                                      | 7,5                            | 9                     | 1000               | NA                         | NA                       | 518                       | 7,5      |
| 8      | 5                                          | 0                                           | 6                                     | 8                                      | 0,5                                     | 2                                        | 7                              | 9                     | 1000               | NA                         | NA                       | 265                       | 7        |
| 9      | 0                                          | 3                                           | 6                                     | 6                                      | 0,5                                     | 2                                        | 7                              | 9                     | 1000               | NA                         | NA                       | 327                       | 7        |
| 10     | 5                                          | 3                                           | 3                                     | 4                                      | 0,5                                     | 2                                        | 7                              | 8                     | 1000               | NA                         | NA                       | 684                       | 7        |
| 11     | 0                                          | 0                                           | 6                                     | 8                                      | 2                                       | 2                                        | 7                              | 9                     | 1000               | NA                         | NA                       | 154                       | 7        |
| 12     | 5                                          | 0                                           | 6                                     | 4                                      | 2                                       | 2                                        | 7                              | 9                     | 1000               | NA                         | NA                       | 329                       | 7        |
| 13     | 5                                          | 0                                           | 3                                     | 8                                      | 2                                       | 2                                        | 7                              | 9                     | 1000               | NA                         | NA                       | 269                       | 7        |
| 14     | 5                                          | 3                                           | 6                                     | 8                                      | 2                                       | 2                                        | 7,5                            | 9                     | 1000               | NA                         | NA                       | 558                       | 7,5      |
| 15     | 0                                          | 0                                           | 3                                     | 8                                      | 1                                       | 2                                        | 7                              | 9                     | 1000               | NA                         | NA                       | 150                       | 7        |
| 16     | 5                                          | 3                                           | 4                                     | 6                                      | 2                                       | 0,5                                      | 7,5                            | 3                     | 7,58               | 4521                       | 953,16                   | 563                       | 7,5      |
| 17     | 2                                          | 3                                           | 3                                     | 8                                      | 0,5                                     | 2                                        | 7,5                            | 9                     | 1000               | NA                         | NA                       | 414                       | 7,5      |
| 18     | 0                                          | 1                                           | 4                                     | 4                                      | 1                                       | 2                                        | 7,5                            | 9                     | 1000               | NA                         | NA                       | 277                       | 7,5      |
| 19     | 0                                          | 1                                           | 3                                     | 8                                      | 0,5                                     | 1                                        | 7,5                            | 9                     | 1000               | NA                         | NA                       | 201                       | 7,5      |
| 20     | 5                                          | 0                                           | 6                                     | 8                                      | 0,5                                     | 0,5                                      | 8,5                            | 3                     | 7,16               | 6421,33                    | 790,01                   | 300                       | 8,5      |
| 21     | 0                                          | 3                                           | 3                                     | 4                                      | 0,5                                     | 0,5                                      | 8,5                            | 3                     | 6,92               | 2708,16                    | 673,34                   | 494                       | 8,5      |
| 22     | 5                                          | 3                                           | 3                                     | 8                                      | 0,5                                     | 0,5                                      | 8,5                            | 2                     | 4,57               | 2509,16                    | 614,67                   | 575                       | 8,5      |

|    |   |   |   |   |     |     |     |   |      |         |         |     |     |
|----|---|---|---|---|-----|-----|-----|---|------|---------|---------|-----|-----|
| 23 | 0 | 0 | 6 | 4 | 2   | 0,5 | 8,5 | 3 | 7,21 | 7425,83 | 1729,17 | 281 | 8,5 |
| 24 | 0 | 0 | 3 | 8 | 2   | 0,5 | 8,5 | 3 | 4,22 | 5731,33 | 865,01  | 185 | 8,5 |
| 25 | 5 | 0 | 3 | 4 | 2   | 0,5 | 8,5 | 3 | 6,88 | 3740,5  | 494,66  | 403 | 8,5 |
| 26 | 5 | 3 | 4 | 4 | 2   | 0,5 | 7,5 | 4 | 17   | 6097    | 863,32  | 598 | 7,5 |
| 27 | 0 | 0 | 6 | 8 | 0,5 | 2   | 8,5 | 3 | 6,96 | 3160,33 | 655,33  | 182 | 8,5 |
| 28 | 5 | 0 | 6 | 4 | 0,5 | 2   | 8,5 | 3 | 3,09 | 2804,67 | 662,84  | 368 | 8,5 |
| 29 | 5 | 0 | 3 | 8 | 0,5 | 2   | 8,5 | 3 | 3,04 | 2592,84 | 358,33  | 288 | 8,5 |
| 30 | 5 | 3 | 6 | 8 | 0,5 | 2   | 7,5 | 9 | 1000 | NA      | NA      | 525 | 7,5 |
| 31 | 0 | 0 | 3 | 4 | 2   | 2   | 8,5 | 3 | 7    | 3662,16 | 933,49  | 260 | 8,5 |
| 32 | 5 | 0 | 6 | 8 | 2   | 2   | 8,5 | 3 | 4,6  | 2194,33 | 607,34  | 291 | 8,5 |
| 33 | 0 | 3 | 6 | 4 | 2   | 2   | 8,5 | 3 | 5,8  | 2765    | 604,16  | 476 | 8,5 |
| 34 | 0 | 3 | 3 | 8 | 2   | 2   | 8,5 | 3 | 6,4  | 5497,16 | 1065,66 | 344 | 8,5 |
| 35 | 5 | 3 | 3 | 4 | 2   | 2   | 8,5 | 2 | 5,88 | 3022    | 875,16  | 693 | 8,5 |
| 36 | 2 | 3 | 6 | 6 | 2   | 2   | 7,5 | 3 | 8,74 | 9006,17 | 1630,66 | 656 | 7,5 |
| 37 | 0 | 3 | 6 | 8 | 0,5 | 0,5 | 8   | 3 | 4,42 | 3220    | 665,66  | 349 | 8   |
| 38 | 5 | 3 | 6 | 4 | 0,5 | 0,5 | 7,5 | 9 | 1000 | NA      | NA      | 506 | 7,5 |
| 39 | 5 | 3 | 6 | 4 | 2   | 0,5 | 7,5 | 3 | 7,82 | 5108,67 | 5247,83 | 639 | 7,5 |
| 40 | 5 | 3 | 6 | 4 | 0,5 | 2   | 7,5 | 3 | 9,2  | 7418,67 | 513,84  | 610 | 7,5 |
| 41 | 5 | 1 | 6 | 4 | 2   | 2   | 7,5 | 9 | 1000 | NA      | NA      | 439 | 7,5 |
| 42 | 5 | 1 | 6 | 4 | 2   | 0,5 | 7,5 | 9 | 1000 | NA      | NA      | 440 | 7,5 |
| 43 | 2 | 3 | 6 | 4 | 2   | 0,5 | 7,5 | 7 | 1000 | NA      | NA      | 490 | 7,5 |
| 44 | 2 | 3 | 3 | 4 | 2   | 2   | 7,5 | 5 | 512  | NA      | NA      | 550 | 7,5 |
| 45 | 2 | 1 | 3 | 4 | 2   | 2   | 7,5 | 9 | 1000 | NA      | NA      | 365 | 7,5 |
| 46 | 2 | 1 | 3 | 4 | 0,5 | 0,5 | 7,5 | 9 | 1000 | NA      | NA      | 347 | 7,5 |
| 47 | 2 | 1 | 3 | 4 | 0,5 | 0,5 | 8   | 3 | 3,79 | 5388,5  | 833,32  | 382 | 8   |
| 48 | 2 | 1 | 6 | 6 | 2   | 2   | 8   | 3 | 3,93 | 4179,84 | 1256    | 311 | 8   |
| 49 | 2 | 1 | 3 | 8 | 2   | 2   | 8   | 3 | 6,23 | 5773    | 1338,33 | 289 | 8   |
| 50 | 5 | 3 | 3 | 6 | 0,5 | 2   | 8   | 3 | 2,05 | 1275,5  | 260,35  | 533 | 8   |
| 51 | 2 | 1 | 3 | 6 | 2   | 0,5 | 8   | 3 | 5,55 | 3332    | 561,84  | 390 | 8   |

|    |    |   |     |   |     |     |     |   |      |         |         |     |     |
|----|----|---|-----|---|-----|-----|-----|---|------|---------|---------|-----|-----|
| 52 | 2  | 1 | 4   | 8 | 2   | 2   | 8   | 3 | 4,05 | 4340,17 | 1179,17 | 284 | 8   |
| 53 | 2  | 1 | 6   | 8 | 2   | 2   | 8   | 3 | 3,33 | 2872,83 | 7650,01 | 285 | 8   |
| 54 | 2  | 1 | 4   | 4 | 0,5 | 0,5 | 8   | 3 | 3,8  | 3912    | 856,33  | 375 | 8   |
| 55 | 2  | 1 | 4   | 4 | 2   | 2   | 7,5 | 9 | 1000 | NA      | NA      | 330 | 7,5 |
| 56 | 2  | 3 | 6   | 4 | 2   | 2   | 7,5 | 3 | 4,2  | 3214,17 | 1043    | 473 | 7,5 |
| 57 | 0  | 0 | 6   | 4 | 2   | 2   | 8   | 9 | 1000 | NA      | NA      | 225 | 8   |
| 58 | 0  | 3 | 6   | 4 | 2   | 2   | 7,5 | 7 | 1000 | NA      | NA      | *   | 7,5 |
| 59 | 0  | 3 | 6   | 4 | 2   | 2   | 8   | 9 | 1000 | NA      | NA      | 409 | 8   |
| 60 | 2  | 3 | 6   | 6 | 2   | 0,5 | 7,5 | 9 | 1000 | NA      | NA      | 429 | 7,5 |
| 61 | 5  | 1 | 6   | 8 | 2   | 2   | 7,5 | 9 | 1000 | NA      | NA      | 367 | 7,5 |
| 62 | 0  | 3 | 6   | 8 | 2   | 2   | 7,5 | 9 | 1000 | NA      | NA      | 300 | 7,5 |
| 63 | 5  | 3 | 3   | 4 | 2   | 0,5 | 7,5 | 3 | 3,5  | 2135,67 | 498,01  | 687 | 7,5 |
| 64 | 5  | 3 | 3   | 4 | 2   | 0,5 | 7,5 | 3 | 3,3  | 2056,66 | 740,84  | 673 | 7,5 |
| 65 | 5  | 3 | 3   | 4 | 2   | 0,5 | 7,5 | 3 | 3,5  | 2135,67 | 498,01  | 687 | 7,5 |
| 66 | 5  | 3 | 3   | 4 | 2   | 0,5 | 8   | 3 | 2,35 | 1572,5  | 146,32  | 760 | 8   |
| 67 | 3  | 3 | 4   | 6 | 2   | 2   | 7,5 | 9 | 1000 | NA      | NA      | 443 | 7,5 |
| 68 | 10 | 0 | 3   | 4 | 2   | 0,5 | 7   | 9 | 1000 | NA      | NA      | *   | 7   |
| 69 | 10 | 0 | 6   | 4 | 2   | 0,5 | 7   | 9 | 1000 | NA      | NA      | *   | 7   |
| 70 | 10 | 0 | 3   | 8 | 2   | 0,5 | 7   | 9 | 1000 | NA      | NA      | *   | 7   |
| 71 | 10 | 0 | 6   | 8 | 2   | 0,5 | 7   | 9 | 1000 | NA      | NA      | *   | 7   |
| 72 | 10 | 0 | 3   | 4 | 2   | 0,5 | 7,5 | 3 | 2,76 | 3704    | 478,75  | 458 | 7,5 |
| 73 | 10 | 0 | 6   | 4 | 2   | 0,5 | 7,5 | 9 | 1000 | NA      | NA      | *   | 7,5 |
| 74 | 10 | 0 | 3   | 8 | 2   | 0,5 | 7,5 | 7 | 692  | NA      | NA      | *   | 7,5 |
| 75 | 10 | 0 | 6   | 8 | 2   | 0,5 | 7,5 | 9 | 1000 | NA      | NA      | *   | 7,5 |
| 76 | 10 | 0 | 3   | 4 | 2   | 0,5 | 8   | 3 | 2,62 | 1502    | 520,5   | 508 | 8   |
| 77 | 10 | 0 | 6   | 4 | 2   | 0,5 | 8   | 3 | 3,26 | 1607,75 | 444,5   | 751 | 8   |
| 78 | 10 | 0 | 3   | 8 | 2   | 0,5 | 8   | 3 | 3,83 | 2335,5  | 467,5   | 899 | 8   |
| 79 | 10 | 0 | 6   | 8 | 2   | 0,5 | 8   | 3 | 5,38 | 3607,75 | 558     | 962 | 8   |
| 80 | 5  | 1 | 4,5 | 6 | 1   | 1   | 8   | 3 | 2,25 | 3585,67 | 490,66  | 425 | 8   |

|    |   |   |     |   |   |   |   |   |      |         |        |     |   |
|----|---|---|-----|---|---|---|---|---|------|---------|--------|-----|---|
| 81 | 5 | 1 | 4,5 | 6 | 1 | 1 | 8 | 3 | 2,5  | 2578    | 419    | 441 | 8 |
| 82 | 5 | 1 | 4,5 | 6 | 1 | 1 | 8 | 3 | 2,7  | 4978,17 | 541,84 | 447 | 8 |
| 83 | 5 | 1 | 4,5 | 6 | 1 | 1 | 8 | 3 | 2    | 2430,83 | 512,5  | 426 | 8 |
| 84 | 5 | 1 | 4,5 | 6 | 1 | 1 | 8 | 3 | 2,54 | 4265,34 | 727,44 | 409 | 8 |

4. Nuclear magnetic resonance shift and chemical shifts analysis: peak assignments for ceftazidime and the inclusion complex of ceftazidime / Hydroxypropyl- $\gamma$ -cyclodextrins

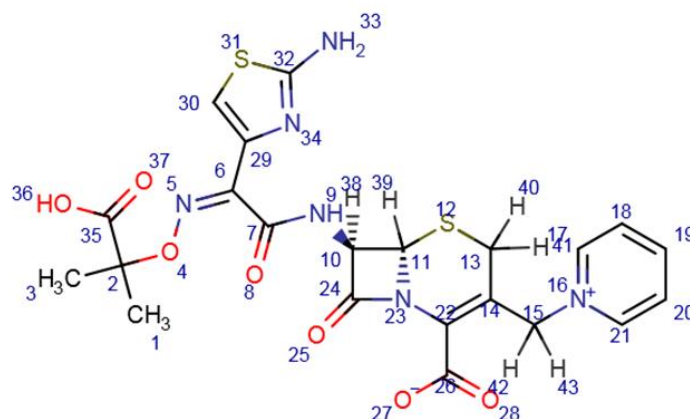

Figure 6 : Peak assignments for ceftazidime ( $^1\text{H}$  RMN)

| Peak | CZ                     |                 | CZ + HP $\gamma$ CD    |                 | Chemical shifts<br>( $\Delta\delta$ , ppm) | Attribution<br>( $^1\text{H}$ ) |
|------|------------------------|-----------------|------------------------|-----------------|--------------------------------------------|---------------------------------|
|      | $\nu(\text{F1})$ [ppm] | Intensity [rel] | $\nu(\text{F1})$ [ppm] | Intensity [rel] |                                            |                                 |
| 1    | 8.988                  | 3.380           | 8.886                  | 1.280           | -0.102                                     | 17, 21                          |
| 2    | 8.600                  | 2.070           | 8.497                  | 0.710           | -0.103                                     | 19                              |
| 3    | 8.119                  | 3.110           | 8.016                  | 1.230           | -0.103                                     | 18, 20                          |
| 4    | 7.027                  | 11.800          | 6.890                  | 1.580           | -0.137                                     | 30                              |
| 5    | 5.890                  | 2.790           | 5.774                  | 0.580           | -0.117                                     | 38                              |
| 6    | 5.600                  | 2.040           | 5.489                  | 0.450           | -0.111                                     | 43                              |
| 7    | 5.401                  | 1.850           | NA                     | NA              | NA                                         | 39                              |
| 8    | 5.320                  | 4.200           | NA                     | NA              | NA                                         | 42                              |
| 9    | 3.661                  | 1.890           | NA                     | NA              | NA                                         | 41                              |
| 10   | 3.268                  | 2.100           | 3.146                  | 0.420           | -0.123                                     | 40                              |
| 11   | 1.526                  | 15.000          | 1.431                  | 5.480           | -0.095                                     | 1,1,1 3,3,3                     |

Figure 2 : Chemical shifts and attribution for the protons of ceftazidime and ceftazidime / Hydroxypropyl- $\gamma$ -cyclodextrins.

Table 2: Summary table of spectral shifts between Vancomycin spectrum without and with HP $\beta$ CD. NA: Not applicable

| Vancomycin |                        |                 | Vancomycin + HP $\beta$ CD |                        |           | Shifts |
|------------|------------------------|-----------------|----------------------------|------------------------|-----------|--------|
| Peak       | $\nu(\text{F1})$ [ppm] | Intensity [rel] | Peak                       | $\nu(\text{F1})$ [ppm] | Intensity |        |
| 1          | 7.7674                 | 6.28            | 1                          | 7.7105                 | 0.04      | -0.057 |
| 2          | 7.6643                 | 4.06            | 2                          | 7.6018                 | 0.03      | -0.063 |
| 3          | 7.6145                 | 4.07            | 3                          | 7.519                  | 0.04      | -0.095 |
| 4          | 7.5999                 | 4.07            | 4                          | NA                     | NA        | NA     |
| 5          | 7.3437                 | 3.98            | 5                          | 7.235                  | 0.01      | -0.109 |
| 6          | 7.1943                 | 0.75            | 6                          | 7.1045                 | 0.02      | -0.090 |



|    |        |      |    |        |      |               |
|----|--------|------|----|--------|------|---------------|
| 7  | 6.9456 | 0.98 | 7  | 6.866  | 0.01 | <b>-0.080</b> |
| 8  | 6.5957 | 0.98 | 8  | 6.4902 | 0.12 | <b>-0.106</b> |
| 9  | 6.5373 | 1.13 | 9  | 6.4316 | 0.11 | <b>-0.106</b> |
| 10 | 6.2562 | 2.18 | 10 | 6.1547 | 0.01 | <b>-0.102</b> |
| 11 | 5.6345 | 15   | 11 | NA     | NA   | NA            |
| 12 | 5.5804 | 3.75 | 12 | NA     | NA   | NA            |
| 13 | 5.479  | 1.54 | 13 | NA     | NA   | NA            |
| 14 | 5.3933 | 1.42 | 14 | NA     | NA   | NA            |
| 15 | 4.9455 | 0.86 | 15 | NA     | NA   | NA            |
| 16 | 4,6325 | 2,24 | 16 | NA     | NA   | NA            |
| 17 | 4,3166 | 1,02 | 17 | NA     | NA   | NA            |
| 18 | 4,147  | 0,66 | 18 | NA     | NA   | NA            |
| 19 | 3,9111 | 0,6  | 19 | NA     | NA   | NA            |
| 20 | 3,8417 | 2,27 | 20 | NA     | NA   | NA            |
| 21 | 3,725  | 3,09 | 21 | NA     | NA   | NA            |
| 22 | 3,5119 | 1,75 | 22 | NA     | NA   | NA            |
| 23 | 2,8213 | 0,74 | 23 | 2,7334 | 0,36 | <b>-0,088</b> |
| 24 | 2,1199 | 0,57 | 24 | 2,0165 | 0,06 | <b>-0,103</b> |
| 25 | 1,8349 | 2,94 | 25 | 1,7631 | 0,04 | <b>-0,072</b> |
| 26 | 1,7635 | 4,02 | 26 | 1,6485 | 0,03 | <b>-0,115</b> |
| 27 | 1,7537 | 0,67 | 27 | NA     | NA   | NA            |
| 28 | 1,6298 | 0,91 | 28 | NA     | NA   | NA            |
| 29 | 1,6225 | 0,75 | 29 | NA     | NA   | NA            |
| 30 | 1,4932 | 1,41 | 30 | 1,4199 | 0,05 | <b>-0,073</b> |
| 31 | 1,2193 | 1,29 | 31 | NA     | NA   | NA            |
| 32 | 1,2114 | 1,12 | 32 | NA     | NA   | NA            |
| 34 | 0,9045 | 1,85 | 34 | 0,8192 | 0,32 | <b>-0,085</b> |
